# Supplementary material for: Night shift work characteristics and 6-sulfatoxymelatonin (MT6s) in rotating night shift nurses and midwives
Source: HighWire-hosted journal article supplement (doi:10.1136/oemed-2011-100273), 2012-02-25
Supplement: oemed-2011-100273-s2.pdf [file oemed-2011-100273-s2.pdf]

Supplemental table 2 Crude and adjusted means of morning MT6s concentrations by selected characteristics of current rotating night shift work (in premenopausal and postmenopausal women)

| Current rotating night shift work characteristics     | Premenopausal women |                            |                                | Postmenopausal women |                            |                                |
|-------------------------------------------------------|---------------------|----------------------------|--------------------------------|----------------------|----------------------------|--------------------------------|
|                                                       | n                   | Crude mean MT6s (ng/mg Cr) | Adjusted* mean MT6s (ng/mg Cr) | n                    | Crude mean MT6s (ng/mg Cr) | Adjusted* mean MT6s (ng/mg Cr) |
| Current night shift work frequency per month (nights) |                     |                            |                                |                      |                            |                                |
| 2-7                                                   | 207                 | 48.0 (43.8-52.2)           | 48.9 (45.0-52.9)               | 105                  | 42.0 (36.0-48.0)           | 44.7 (39.6-49.8)               |
| ≥8                                                    | 23                  | 33.9 (23.2-44.6)           | 33.9 (24.1-43.8)               | 19                   | 41.6 (27.5-55.7)           | 41.5 (30.2-52.8)               |
|                                                       |                     | <i>p</i><br>0.026          | <i>p</i><br>0.011              |                      | 0.958                      | 0.619                          |
| Activities at work during the night shift**           |                     |                            |                                |                      |                            |                                |
| 1§                                                    | 16                  | 47.0 (31.9-62.1)           | 47.1 (33.0-61.1)               | 11                   | 48.6 (28.5-68.7)           | 53.1 (36.2-70.1)               |
| 1 and 2 or 2                                          | 155                 | 48.6 (43.7-53.5)           | 48.7 (44.1-53.3)               | 86                   | 40.9 (34.3-47.5)           | 42.2 (36.8-47.5)               |
| any combination with 3                                | 54                  | 42.6 (34.8-50.4)           | 45.6 (38.0-53.3)               | 24                   | 39.7 (27.4-52.1)           | 44.7 (34.0-55.3)               |
|                                                       |                     | <i>p-trend</i><br>0.318    | <i>p-trend</i><br>0.647        |                      | 0.526                      | 0.605                          |
| Napped during the night shift between 23:00 and 3:00  |                     |                            |                                |                      |                            |                                |
| No                                                    | 118                 | 45.2 (39.7-50.7)           | 44.3 (39.2-49.3)               | 75                   | 42.2 (35.1-49.4)           | 45.0 (39.0-51.1)               |
| Yes                                                   | 112                 | 47.9 (40.1-53.6)           | 50.8 (45.1-56.4)               | 49                   | 41.6 (32.8-50.4)           | 42.9 (35.7-50.1)               |
|                                                       |                     | <i>p</i><br>0.511          | <i>p</i><br>0.094              |                      | 0.919                      | 0.661                          |
| Duration of nap (if naps during 23:00-3:00)           |                     |                            |                                |                      |                            |                                |

|                                                      |                |                  |                  |    |                  |                  |
|------------------------------------------------------|----------------|------------------|------------------|----|------------------|------------------|
| (hours)**                                            |                |                  |                  |    |                  |                  |
| 0                                                    | 113            | 46.2 (40.6-51.8) | 45.2 (40.1-50.2) | 72 | 41.2 (33.9-48.4) | 44.1 (38.0-50.3) |
| ≤2                                                   | 47             | 40.0 (32.0-48.1) | 44.2 (36.2-52.2) | 25 | 41.4 (29.0-53.8) | 42.1 (32.0-52.2) |
| >2                                                   | 65             | 53.9 (46.0-61.8) | 55.6 (48.0-63.2) | 24 | 41.9 (29.1-54.5) | 43.4 (33.0-53.9) |
|                                                      | <i>p-trend</i> | <i>0.187</i>     | <i>0.037</i>     |    | <i>0.926</i>     | <i>0.850</i>     |
| Duration of work during the night shift<br>(hours)** |                |                  |                  |    |                  |                  |
| < 10                                                 | 67             | 53.6 (45.8-61.4) | 55.0 (47.5-62.4) | 25 | 41.0 (28.7-53.2) | 41.8 (31.8-51.8) |
| ≥10                                                  | 158            | 44.4 (39.7-49.0) | 45.0 (40.7-49.3) | 96 | 41.4 (35.2-47.7) | 44.0 (38.7-49.3) |
|                                                      | <i>p-trend</i> | <i>0.043</i>     | <i>0.022</i>     |    | <i>0.948</i>     | <i>0.703</i>     |
| Type of light at work**                              |                |                  |                  |    |                  |                  |
| Dim                                                  | 95             | 50.0 (43.7-56.4) | 50.4 (44.5-56.4) | 56 | 39.7 (31.7-47.7) | 41.4 (34.8-48.2) |
| Full light                                           | 103            | 43.8 (38.0-49.5) | 45.0 (39.6-50.5) | 54 | 45.3 (36.6-54.0) | 46.2 (39.0-53.3) |
| Surgical lamp                                        | 27             | 49.2 (37.3-61.1) | 49.8 (38.7-60.8) | 11 | 31.7 (15.5-47.8) | 41.3 (25.8-56.9) |
|                                                      | <i>p-trend</i> | <i>0.471</i>     | <i>0.518</i>     |    | <i>0.930</i>     | <i>0.609</i>     |

§ Categories of the activities 1 = care for patients, injections, administering pills; 2 = small interventions; 3 = assistance in operations or births delivery

\* adjusted for evening MT6s concentrations, number of full term births and age of menarche

\*\* missing data for 5premenopausal and 3 postmenopausal
