# Supplementary material for: Night shift work characteristics and 6-sulfatoxymelatonin (MT6s) in rotating night shift nurses and midwives
Source: HighWire-hosted journal article supplement (doi:10.1136/oemed-2011-100273), 2012-02-25
Supplement: oemed-2011-100273-s3.pdf [file oemed-2011-100273-s3.pdf]

Supplemental table 3 Mean MT6 concentrations in ng/mg Cr in the nurses and midwives by night shift work load during the seven days preceding the morning urine sample collection (in premenopausal and postmenopausal women).

|                                                                    | Premenopausal women |                              |                                        | Postmenopausal women |                              |                                        |
|--------------------------------------------------------------------|---------------------|------------------------------|----------------------------------------|----------------------|------------------------------|----------------------------------------|
| Characteristics                                                    | N                   | Morning MT6s mean (ng/mg Cr) | Adjusted* morning MT6s mean (ng/mg Cr) | N                    | Morning MT6s mean (ng/mg Cr) | Adjusted* morning MT6s mean (ng/mg Cr) |
| Number of night shifts during preceding seven days                 |                     |                              |                                        |                      |                              |                                        |
| 1                                                                  | 56                  | 49.3 (40.0-56.5)             | 48.1 (40.4-55.9)                       | 32                   | 47.3 (35.7-58.8)             | 44.4 (35.2-53.6)                       |
| 2                                                                  | 137                 | 46.0 (40.9-51.2)             | 47.6 (42.7-52.5)                       | 72                   | 38.3 (31.4-45.2)             | 43.9 (37.7-50.1)                       |
| ≥3                                                                 | 37                  | 45.3 (35.5-55.1)             | 44.9 (35.8-54.0)                       | 20                   | 47.2 (32.7-61.8)             | 44.9 (33.3-56.4)                       |
|                                                                    |                     | <i>0.621</i>                 | <i>0.614</i>                           |                      | <i>0.785</i>                 | <i>0.967</i>                           |
| <i>p</i>                                                           |                     |                              |                                        |                      |                              |                                        |
| Night shift hours during preceding seven days                      |                     |                              |                                        |                      |                              |                                        |
| ≤24                                                                | 181                 | 46.4 (41.9-50.9)             | 47.8 (43.5-52.0)                       | 92                   | 41.4 (35.0-47.8)             | 44.5 (39.1-49.9)                       |
| >24                                                                | 49                  | 46.7 (38.0-55.3)             | 45.7 (37.8-53.6)                       | 32                   | 43.8 (32.6-54.9)             | 43.4 (34.5-52.2)                       |
|                                                                    |                     | <i>0.953</i>                 | <i>0.648</i>                           |                      | <i>0.714</i>                 | <i>0.835</i>                           |
| <i>p</i>                                                           |                     |                              |                                        |                      |                              |                                        |
| Consecutive nights immediately before the morning urine collection |                     |                              |                                        |                      |                              |                                        |
| 1                                                                  | 219                 | 46.9 (42.8-51.0)             | 47.9 (44.0-51.7)                       | 120                  | 42.2 (36.4-47.8)             | 44.2 (39.5-48.9)                       |
| ≥2                                                                 | 11                  | 38.3 (21.8-54.9)             | 37.2 (22.2-52.2)                       | 4                    | 37.3 (08.2-66.5)             | 43.3 (18.0-68.7)                       |
|                                                                    |                     | <i>0.347</i>                 | <i>0.207</i>                           |                      | <i>0.758</i>                 | <i>0.891</i>                           |
| <i>p</i>                                                           |                     |                              |                                        |                      |                              |                                        |

\* adjusted for evening MT6s concentrations, number of full term births and age at menarche
